# Supplementary material
Source: PubMed Central journal article supplement (PMC5831426)
Supplement: jamasurg-152-540-s001.pdf [file jamasurg-152-540-s001.pdf]

## Supplementary Online Content

Smits FJ, van Santvoort HC, Besselink MG, et al; Dutch Pancreatic Cancer Group. Management of severe pancreatic fistula after pancreatoduodenectomy. *JAMA Surg*. Published online February 22, 2017. doi:10.1001/jamasurg.2016.5708

**eTable 1.** Crude Baseline Characteristics

**eTable 2.** Status Based on APACHE II Category

This supplementary material has been provided by the authors to give readers additional information about their work.

| <b>eTable 1. Crude Baseline Characteristics*</b> |                                  |                            |                |
|--------------------------------------------------|----------------------------------|----------------------------|----------------|
| <b>Characteristics</b>                           | <b>Catheter Drainage (n=227)</b> | <b>Relaparotomy (n=82)</b> | <b>P Value</b> |
| Age – yr (median (IQR))                          | 65 (59-72)                       | 66 (57-71)                 | 0.65           |
| Male sex – no. (%)                               | 147 (65)                         | 62 (76)                    | 0.07           |
| Coexisting condition – no. (%)                   |                                  |                            |                |
| Cardiovascular disease                           | 60 (26)                          | 32 (39)                    | 0.03           |
| Pulmonary disease                                | 14 (6)                           | 9 (11)                     | 0.16           |
| Chronic renal insufficiency                      | 4 (2)                            | 2 (2)                      | 0.66*          |
| History of upper abdominal surgery               | 51 (23)                          | 19 (23)                    | 0.90           |
| ASA class on admission (%)                       |                                  |                            | 0.006          |
| I: healthy status                                | 50 (22)                          | 14 (17)                    |                |
| II: mild systemic disease                        | 150 (66)                         | 46 (56)                    |                |
| III: severe systemic disease                     | 27 (12)                          | 22 (27)                    |                |
| Body-mass index (mean ±SD) †                     | 26.4±3.6                         | 26.7±4.5                   | 0.47           |
| Weight loss - no. (%)                            | 113/222 (51)                     | 42/77 (56)                 | 0.58           |
| Quantity – kg (median (IQR)) ‡                   | 2 (0-6)                          | 4 (0-8)                    | 0.42           |
| Preoperative ERCP §                              |                                  |                            | 0.16           |
| Without intervention                             | 43 (19)                          | 8 (10)                     |                |
| With stenting/papillotomy                        | 122 (54)                         | 45 (55)                    |                |
| Preoperative cholestasis – no. (%)               | 165 (73)                         | 56 (68)                    | 0.45           |
| Operating characteristics                        |                                  |                            |                |
| Pylorus preserving pancreatoduodenectomy         | 183 (81)                         | 64 (78)                    | 0.62           |
| Reconstruction portal vein                       | 7/220 (3)                        | 3/81 (4)                   | 0.73*          |
| Additional organ resection                       | 10/220 (5)                       | 10/81 (12)                 | 0.01           |
| Abdominal drain                                  | 225 (99)                         | 79 (96)                    | 0.12*          |
| Pathology malignant – no. (%)                    | 210 (93)                         | 71 (87)                    | 0.11           |
| Disease severity 24h before first intervention   |                                  |                            |                |
| APACHE II (median (IQR)) #                       | 8 (6-10)                         | 10 (7-14)                  | <0.001         |
| SIRS – no. (%)**                                 | 99 (44)                          | 47 (58)                    | 0.03           |
| Organ failure – no. (%)                          | 27 (12)                          | 39 (48)                    | <0.001         |
| Single-organ failure – no. (%)                   | 8 (18)                           | 26 (32)                    | <0.001         |
| Multiple-organ failure – no. (%)                 | 9/226 (4)                        | 13 (16)                    | <0.001         |
| Previous re-intervention – no. (%)               | 10 (4)                           | 12 (15)                    | 0.002          |

\* Normal distributed values are presented as mean ± SD, ASA denotes American Society of Anaesthesiologists; P-values denoted with \* are obtained using the Fishers exact Test

† Body-mass index, weight in kilograms divided by the square of the height in meters; out of 212 patients in drainage group and 80 patients in relaparotomy group

‡ Crude data calculated over 220 patients in drainage group and 74 patients in relaparotomy group

§ Crude data calculated over 226 patients in drainage group and 82 patients in relaparotomy group

|| Defined as jaundice, elevated bilirubin and/or need for preoperative biliary drainage

¶ Crude data calculated over 220 patients in drainage group and 78 patients in relaparotomy group

# Acute Physiology and Chronic Health Evaluation (APACHE II) scale from 0-71, higher scores indicating more severe disease

\*\* Systemic inflammatory response syndrome as defined by the American College of Chest Physicians and the Society of Critical Care Medicine

| eTable 2. Status Based on APACHE II Category                                  | APACHE II <9              |                     |                  |         | APACHE II 9-12           |                     |                   |         | APACHE II >12            |                     |                    |         |
|-------------------------------------------------------------------------------|---------------------------|---------------------|------------------|---------|--------------------------|---------------------|-------------------|---------|--------------------------|---------------------|--------------------|---------|
|                                                                               | Catheter Drainage (n=136) | Relaparotomy (n=33) | RR (95%CI)       | P Value | Catheter drainage (n=74) | Relaparotomy (n=19) | RR (95%CI)        | P Value | Catheter Drainage (n=17) | Relaparotomy (n=28) | RR (95%CI)         | P Value |
| Death – no. (%)                                                               | 14 (10)                   | 8 (24)              | 0.43 (0.19-0.93) | 0.044*  | 7 (10)                   | 6 (32)              | 0.30 (0.11-0.79)  | 0.023*  | 4 (24)                   | 16 (57)             | 0.41 (0.16-1.03)   | 0.035*  |
| Secondary endpoints                                                           |                           |                     |                  |         |                          |                     |                   |         |                          |                     |                    |         |
| Major complications after first intervention for pancreatic fistula – no. (%) |                           |                     |                  |         |                          |                     |                   |         |                          |                     |                    |         |
| New-onset single-organ failure                                                | 27 (20)                   | 16 (49)             | 0.41 (0.25-0.67) | 0.001   | 17 (23)                  | 6 (31)              | 0.73 (0.33-1.59)  | 0.552*  | 2 (12)                   | 10 (36)             | 0.33 (0.08-1.33)   | 0.096*  |
| New-onset multiple-organ failure                                              | 11 (8)                    | 11 (33)             | 0.24 (0.12-0.51) | 0.001*  | 12 (16)                  | 9 (47)              | 0.34 (0.17-0.70)  | 0.011*  | 2 (12)                   | 12 (43)             | 0.28 (0.07-1.08)   | 0.046*  |
| Post pancreatectomy haemorrhage †                                             | 18 (13)                   | 6 (18)              | 0.73 (0.31-1.69) | 0.578*  | 19 (26)                  | 2 (11)              | 2.44 (0.62-9.57)  | 0.224*  | 3 (18)                   | 9 (32)              | 0.55 (0.17-1.75)   | 0.488*  |
| Gastroenterostomy leakage †                                                   | 2 (2)                     | 2 (6)               | 0.24 (0.04-1.66) | 0.172*  | 2 (3)                    | 0 (0)               | 1.35 (0.06-27.03) | >0.99*  | 1 (6)                    | 0 (0)               | 4.83 (0.20-112.35) | 0.378*  |
| Bile leakage †                                                                | 10 (7)                    | 3 (9)               | 0.81 (0.24-2.78) | 0.720*  | 6 (8)                    | 1 (5)               | 1.54 (0.20-12.04) | >0.99*  | 1 (6)                    | 5 (18)              | 0.33 (0.04-2.59)   | 0.385*  |
| Long term complications – no. (%)                                             |                           |                     |                  |         |                          |                     |                   |         |                          |                     |                    |         |
| New-onset diabetes ‡                                                          | 18/122 (15)               | 13/31 (42)          | 0.35 (0.19-0.64) | 0.001   | 7/69 (10)                | 7/19 (37)           | 0.28 (0.11-0.69)  | 0.010*  | 3/16 (19)                | 7/19 (37)           | 0.51 (0.16-1.65)   | 0.285*  |
| New-onset exocrine pancreatic insufficiency ‡                                 | 48/118 (41)               | 16/28 (57)          | 0.71 (0.48-1.05) | 0.114   | 31/65 (47)               | 7/18 (39)           | 1.23 (0.65-2.31)  | 0.507   | 6/15 (40)                | 11/16 (69)          | 0.58 (0.29-1.17)   | 0.108   |
| Interventions                                                                 |                           |                     |                  |         |                          |                     |                   |         |                          |                     |                    |         |
| Completion pancreatectomy – no. (%)                                           | 4 (3)                     | 10 (30)             | 0.10 (0.03-0.29) | <0.001* | 2 (3)                    | 5 (26)              | 0.10 (0.02-0.49)  | 0.004*  | 1 (6)                    | 6 (21)              | 0.28 (0.04-2.09)   | 0.227*  |
| No. of additional relaparotomies                                              |                           |                     |                  | <0.001  |                          |                     |                   | 0.923   |                          |                     |                    | 0.849   |
| No. of patients (%)                                                           | 22 (16)                   | 16 (48)             |                  |         | 12 (16)                  | 3 (16)              |                   |         | 6 (35)                   | 11 (39)             |                    |         |
| Median (range) per patient                                                    | 0 (0-2)                   | 0 (0-8)             |                  |         | 0 (0-4)                  | 0 (0-3)             |                   |         | 0 (0-5)                  | 0 (0-5)             |                    |         |
| No. of additional catheter drainages                                          |                           |                     |                  | 0.391   |                          |                     |                   | 0.061   |                          |                     |                    | 0.108   |
| No. of patients (%)                                                           | 55 (40)                   | 16 (48)             |                  |         | 40 (55)                  | 7 (37)              |                   |         | 11 (65)                  | 11 (39)             |                    |         |
| Median (range) per patient                                                    | 0 (0-11)                  | 0 (0-5)             |                  |         | 1 (0-9)                  | 0 (0-2)             |                   |         | 1 (0-7)                  | 0 (0-5)             |                    |         |
| No. of interventions for pancreatic fistula                                   |                           |                     |                  | 0.048   |                          |                     |                   | 0.533   |                          |                     |                    | 0.137   |
| Median (range) per patient                                                    | 1 (0-8)                   | 2 (1-5)             |                  |         | 2 (0-9)                  | 1 (1-4)             |                   |         | 3 (0-7)                  | 1 (1-7)             |                    |         |
| No. of interventions during admission                                         |                           |                     |                  | 0.001   |                          |                     |                   | 0.345   |                          |                     |                    | 0.803   |
| Median (range) per patient                                                    | 1 (0-12)                  | 3 (1-13)            |                  |         | 2 (0-13)                 | 2 (1-5)             |                   |         | 3 (0-9)                  | 3 (1-7)             |                    |         |
| Hospitalization course                                                        |                           |                     |                  |         |                          |                     |                   |         |                          |                     |                    |         |
| New ICU admission after first intervention – no. (%)                          | 32 (24)                   | 26 (79)             | 0.29 (0.21-0.42) | <0.001  | 24 (33)                  | 19 (100)            | 0.32 (0.23-0.45)  | <0.001  | 11 (65)                  | 27 (96)             | 0.67 (0.47-0.96)   | 0.008*  |
| Length of ICU stay (median (IQR)) §,                                          | 0 (0-0)                   | 5 (0-10)            |                  | <0.001  | 0 (0-2)                  | 8 (4-12)            |                   | <0.001  | 2 (0-17)                 | 9 (4-29)            |                    | 0.110   |
| Length of hospital stay (median (IQR))                                        | 26 (19-38)                | 54 (40-61)          |                  | <0.001  | 36 (25-63)               | 47 (31-68)          |                   | 0.171   | 47 (30-73)               | 61 (51-86)          |                    | 0.137   |
| Duration of pancreatic fistula (median (IQR))   ,¶                            | 28 (16-48)                | 25 (15-48)          |                  | 0.750   | 33 (21-66)               | 39 (12-87)          |                   | 0.989   | 35 (22-65)               | 43 (29-73)          |                    | 0.381   |
